# Supplementary material for: Functionalization of SWNTs to facilitate the coordination of metal ions, compounds and clusters
Source: Royal Society of Chemistry journal article supplement (doi:10.1039/b801166d), 2008-01-01
Supplement: b801166d.pdf [file b801166d.pdf]

# **Functionalization of SWNTs to Facilitate the Coordination of Metal Ions, Compounds and Clusters**

Christopher E. Hamilton, Douglas Ogrin, Laura McJilton, Valerie C. Moore, Robin Anderson,  
Richard E. Smalley, and Andrew R. Barron\*

*Richard E. Smalley Institute for Nanoscale Science and Technology, Carbon Nanotechnology  
Laboratory, and Department of Chemistry, Rice University, Houston, Texas 77005, USA*

Supplementary Materials

**Table S1.** XPS analysis of functionalized SWNTs.

|                                                                    | C    | O    | N   | S   | P     |
|--------------------------------------------------------------------|------|------|-----|-----|-------|
| DD-SWNT-COOH                                                       | 92.2 | 7.8  | -   | -   | -     |
| US-SWNT                                                            | 66.2 | 33.8 | -   | -   | -     |
| DD-SWNT-CO <sub>2</sub> -py ( <b>1</b> )                           | 90.7 | 7.5  | 1.8 | -   | -     |
| DD-SWNT-SH ( <b>5</b> )                                            | 89.2 | 8.9  | 1.0 | 0.9 | -     |
| DD-SWNT-PPh <sub>2</sub> ( <b>6</b> )                              | 85.9 | 14.0 | -   | -   | ≈ 0.1 |
| DD-SWNT-C <sub>6</sub> H <sub>4</sub> Bu <sup>t</sup> ( <b>7</b> ) | 75.2 | 24.8 | -   | -   | -     |
| SWNT-py ( <b>8</b> )                                               | 72.7 | 24.4 | 2.9 | -   | -     |
| SWNT-SH ( <b>9</b> )                                               | 84.1 | 14.8 | -   | 1.0 | -     |
| SWNT-PPh <sub>2</sub> ( <b>10</b> )                                | 76.2 | 23.6 | -   | -   | ≈ 0.1 |
| US-SWNT-py ( <b>12</b> )                                           | 52.2 | 46.7 | 1.1 | -   | -     |
| US-SWNT-SH ( <b>13</b> )                                           | 71.0 | 18.1 | 5.7 | 5.2 | -     |
| US-SWNT-P(O)Ph <sub>2</sub> ( <b>14</b> )                          | 75.8 | 24.0 | -   | -   | 0.2   |

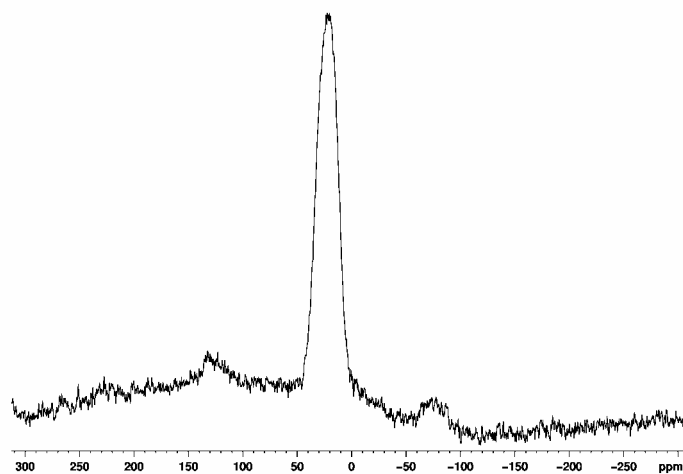

**Fig. S1.** MAS  $^{31}\text{P}$  NMR spectrum of US-SWNT-P(O)Ph<sub>2</sub> (**14**).

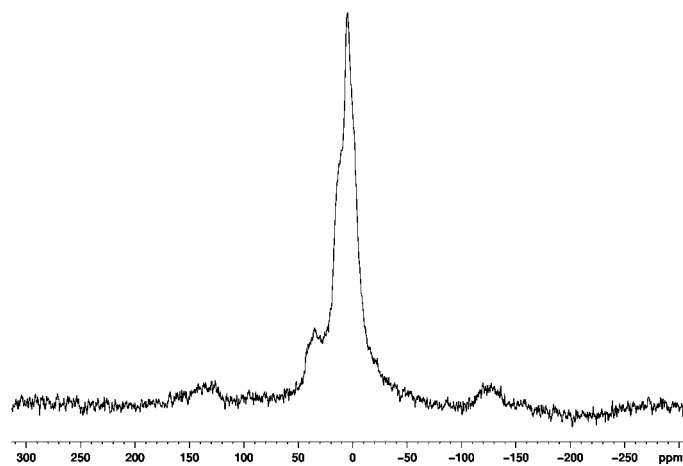

**Fig. S2.** MAS  $^{31}\text{P}$  NMR spectrum of the product from the partial reduction of US-SWNT-P(O)Ph<sub>2</sub> (**14**) to US-SWNT-PPh<sub>2</sub> (**15**).

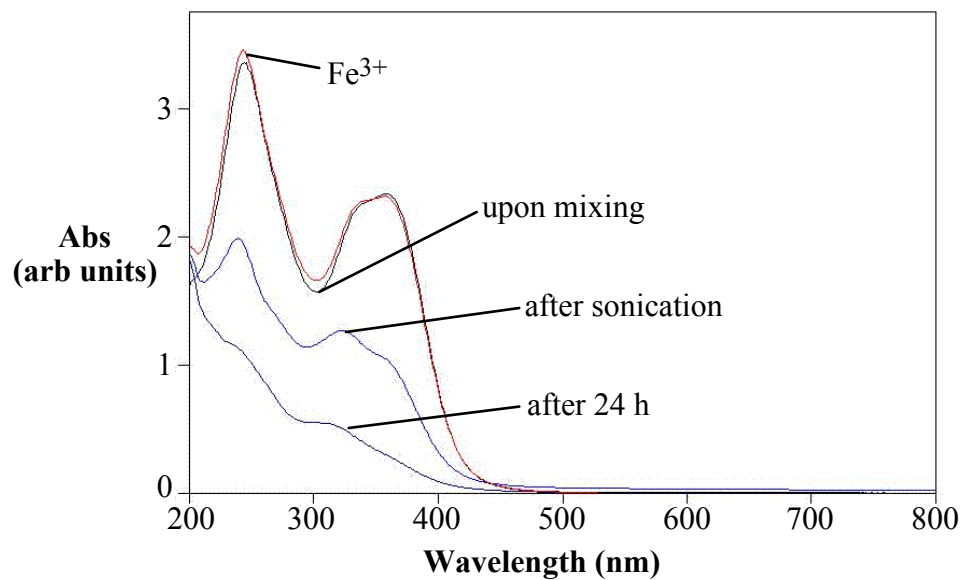

**Fig. S3.** UV-visible spectra of the product from the addition of DD-SWNT-CO<sub>2</sub>-py (**1**) to a  $\text{Fe}^{3+}$  solution in EtOH.

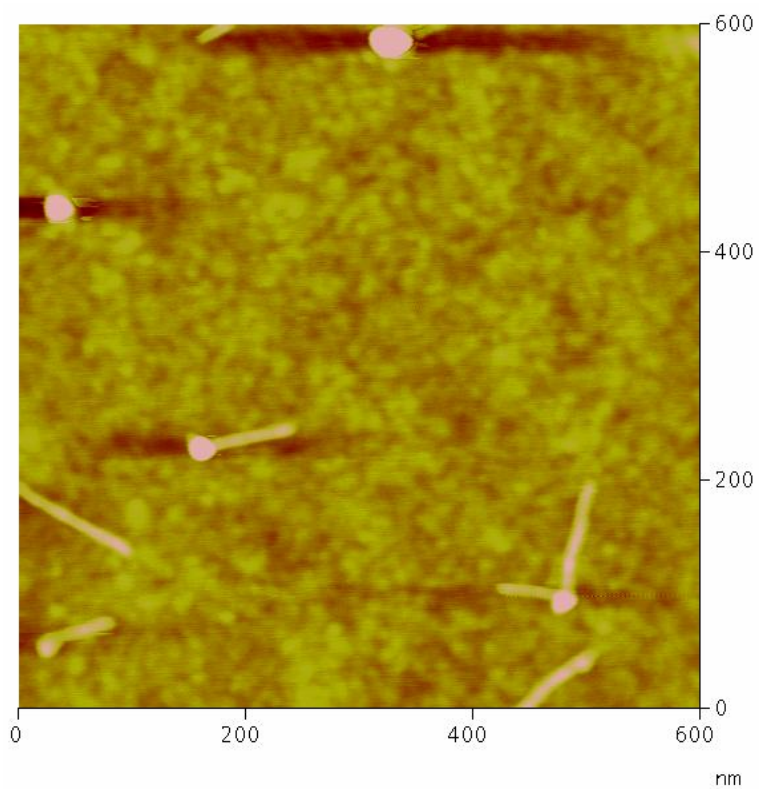

**Fig. S4.** AFM images of DD-SWNT-CO<sub>2</sub>-py-FeMoC showing the presence of the 2 nm FeMoC molecule on the end of individual DD-SWNTs.

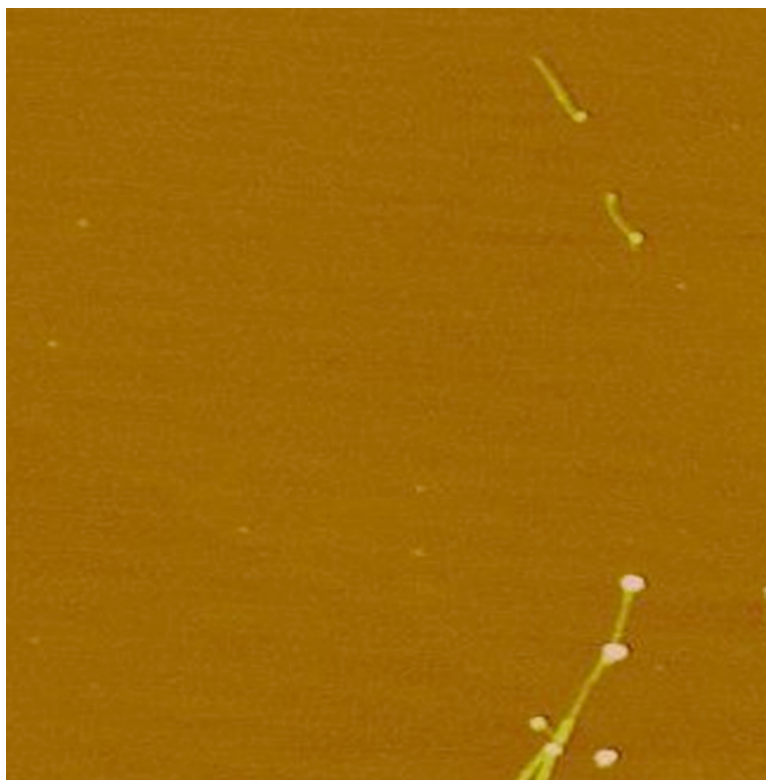

**Fig. S5.** AFM image (2.0 x 2.0  $\mu\text{m}$ ) of DD-SWNT-SH-FeMoC showing the presence of the 2 nm FeMoC molecule on the end of individual nanotubes.
